# Supplementary material for: Levels, sources and spatiotemporal variation of nutrients and micropollutants in small streams of a Mediterranean River basin
Source: Royal Society of Chemistry journal article supplement (doi:10.1039/c1em10637f), 2011-01-01
Supplement: c1em10637f.pdf [file c1em10637f.pdf]

## **SUPPLEMENTARY MATERIAL (SM)**

**Manuscript title:** Levels, sources and spatiotemporal variation of nutrients and micropollutants in small streams of a Mediterranean River Basin

**Authors:** Ioannis Karaouzas, Dimitra A. Lambropoulou, Nikolaos T. Skoulikidis, Triantafyllos A. Albanis

**Number of pages of the SM section:** Eleven

**Number of pages of the text:** Two

**Number of figures:** Two

**Number of tables:** Six

## Methods & Materials

### *Study area*

The Evrotas River Basin, a large mid-altitude Mediterranean basin, is located in southeastern Peloponnesus (Fig.1) in the Prefectures of Laconia and Arcadia covering an area of 2,418 km<sup>2</sup>. The river discharges into the Laconikos Gulf after crossing 90 km of floodplains and semi-mountainous areas. The basin expands between the mountain complexes of Taygetos (2407 m asl) and Parnon (1940 m asl), where numerous perennial, intermittent and ephemeral streams discharge into the main course. The mountainous area of the basin is formed by Mesozoic-Palaeogene limestones (42% of the basin) and impermeable rocks, such as flysch and schists (29% of the basin), while the lower parts are filled up with Pliocene and Quaternary sediments. The Evrotas basin has a typical Mediterranean climate with mild and cold winters and prolonged hot and dry summers with an average annual temperature of 16°C. The majority of rainfall occurs during the months of October through March; highest rainfall precipitation being in December and lowest in June.

The vast majority of the river basin is covered by natural and semi-natural areas accounting for 61% of the total river basin followed by agricultural areas that account for 38% while urban areas account for 1%. The main crops are olives and oranges which cover about 90% of the agricultural land and constitute Laconia as one of the main and largest producers of olive oil and orange juice in Greece. The dominant pressures in Evrotas River Basin derive mainly from agricultural activities and include overexploitation of water resources for irrigation, disposal of agro-industrial wastes (mainly from olive oil mills and orange juice processing factories) and agrochemical pollution.

### *Reagents and materials*

High purity (96–99.9%) standards of the selected pesticides were supplied by Riedel-de Hën (Germany). Individual stock solutions were prepared by diluting each analyte solution with methanol. Working solutions were prepared by diluting stock solutions with methanol, for sample fortification, and with ethyl acetate or hexane-dichloromethane (1:1), for GC injection. All stock and working standard solutions were stored in the dark at  $-20\text{ }^{\circ}\text{C}$ . The standard mixtures were used to prepare the calibration solutions. Pesticide-grade solvents methanol, hexane, dichloromethane and ethyl acetate, used for sample preparation and chromatographic analysis were supplied from Pestiscan (Labscan, Ltd, Dublin, Ireland) and sodium chloride from Merck (Darmstadt, Germany).

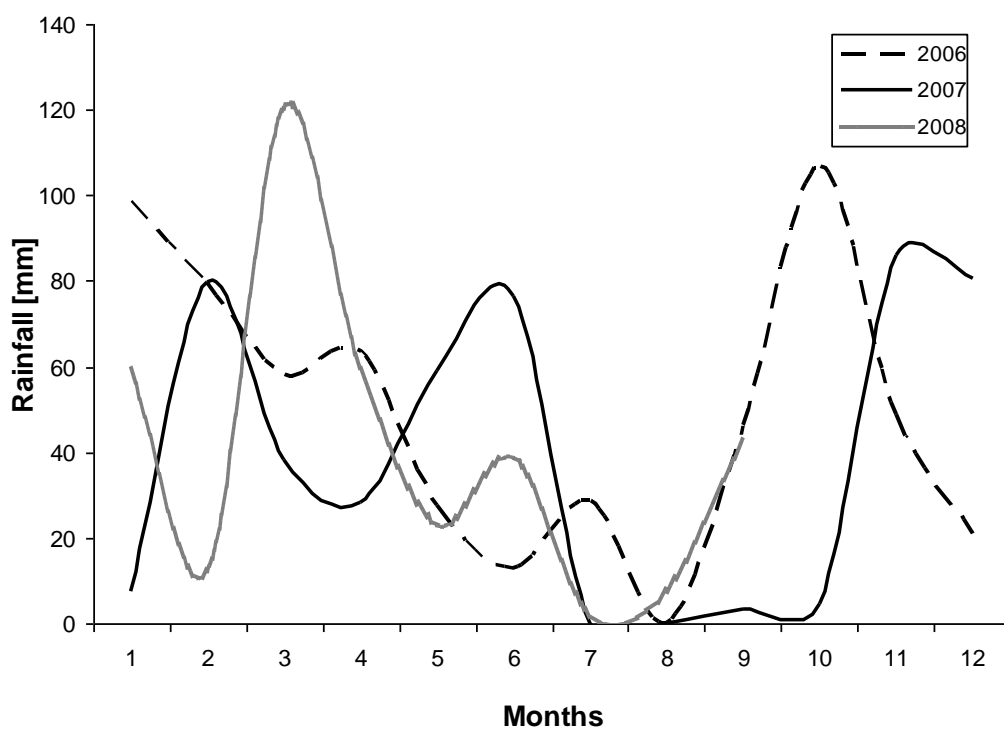

**Fig. SM-1.** Rainfall precipitation in the Evrotas River Basin for the years 2006 - 2008.

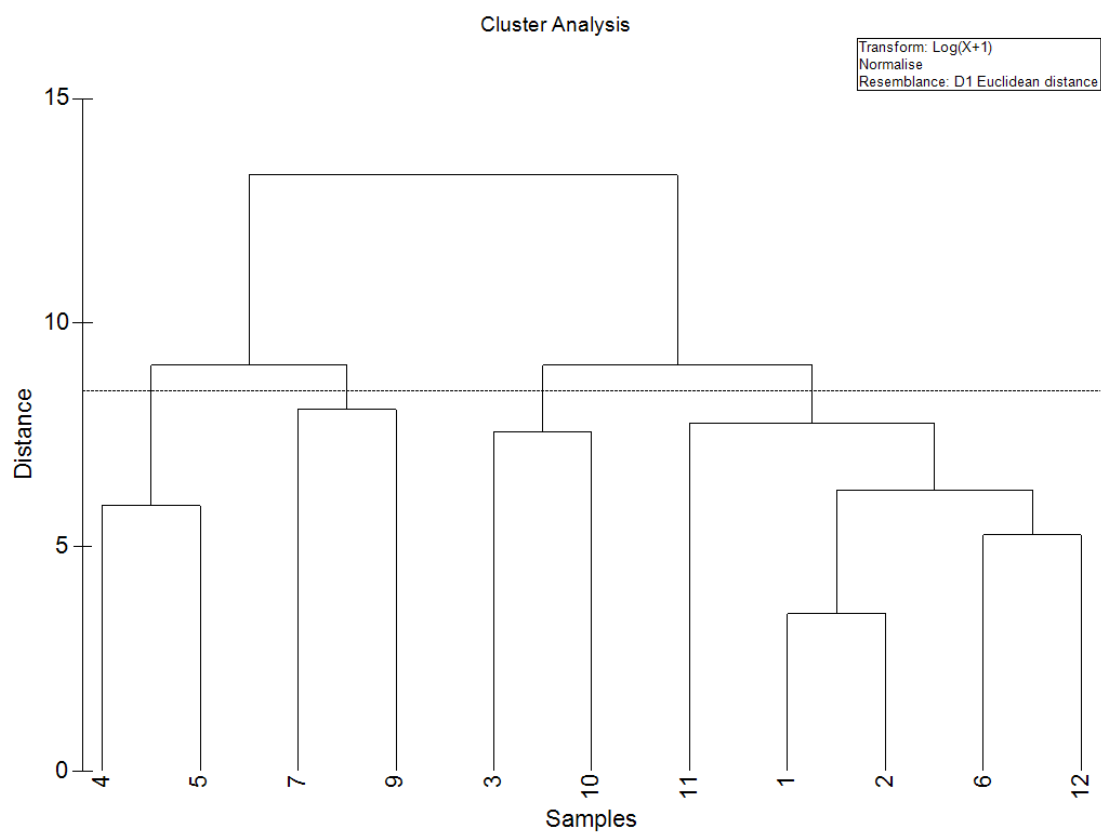

**Fig. SM-2.** Cluster analysis of chemical and physicochemical data for the 11 sampling sites. Group A: 4, 5; Group B: 7, 9; Group C: 10, 3; Group D: 1, 2, 6, 11, 12.

**Table SM-1.** Retention time and characteristics ions of all pesticides by GC-MS.

| Pesticides    | Time  | M <sub>r</sub> | Diagnostic |     |
|---------------|-------|----------------|------------|-----|
|               | (min) |                | m/z ions   |     |
| Dichlorvos    | 14.34 | 220            | 109        | 185 |
| EPTC          | 17.52 | 189            | 128        | 43  |
| Captafol      | 18.15 | 349            | 79         | 150 |
| Mevinphos     | 19.49 | 224            | 127        | 192 |
| Captan        | 21.48 | 299            | 79         | 107 |
| Molinate      | 22.48 | 187            | 126        |     |
| Propachlor    | 24.12 | 211            | 120        | 176 |
| Ethoprophos   | 24.87 | 243            | 158        | 126 |
| Ethafluralin  | 25.21 | 316            | 292        | 276 |
| Trifluralin   | 25.61 | 335            | 264        | 306 |
| Monocrotophos | 26.06 | 223            | 192        | 127 |
| Dimethoate    | 26.95 | 229            | 87         | 93  |
| Simazine      | 27.40 | 202            | 201        | 186 |
| Atrazine      | 27.55 | 215            | 200        | 173 |
| Diazinon      | 28.49 | 304            | 137        | 179 |
| Pyrimethanil  | 28.59 | 198            | 102        | 129 |
| Phosphamidon  | 30.16 | 264            | 127        | 72  |
| M.Parathion   | 30.84 | 269            | 160        | 188 |
| Alachlor      | 31.01 | 263            | 263        | 109 |
| Prometryne    | 31.51 | 241            | 241        | 184 |
| Fenitrothion  | 32.18 | 277            | 277        | 125 |
| Malathion     | 32.79 | 330            | 173        | 125 |
| Metolachlor   | 32.78 | 283            | 162        | 238 |
| Fenthion      | 33.37 | 278            | 278        | 169 |
| E.Parathion   | 33.55 | 291            | 291        | 109 |
| Dicofol       | 33.95 | 368            | 139        | 251 |
| Penconazole   | 35.57 | 248            | 192        | 157 |
| Phenthoate    | 36.29 | 274            | 79         | 125 |
| Triadimenol   | 36.55 | 168            | 112        | 128 |
| Methidathion  | 37.20 | 302            | 85         | 145 |
| α-Endosulfan  | 38.15 | 404            | 195        | 241 |
| Fenamiphos    | 39.16 | 303            | 303        | 154 |
| Muchlobutanil | 40.79 | 288            | 179        | 150 |
| Oxyfluorfen   | 41.19 | 361            | 252        | 331 |
| Endrin        | 41.90 | 317            | 263        | 281 |
| β-Endosulfan  | 42.48 | 404            | 195        | 339 |
| Ethion        | 43.00 | 231            | 203        | 97  |
| Benalaxyl     | 43.75 | 325            | 148        | 91  |
| Carbofenthion | 43.85 | 342            | 157        | 199 |

**Table SM-2.** Properties and physicochemical characteristics of the pesticides detected in Evrotas River Basin.

| <i>Pesticide Name</i> | <i>Molecular Mass (g/mol)</i> | <i>Solubility* (mg/L)</i> | <i>Solubility in water**</i> | <i>t1/2 in Water (Days)</i> | <i>t1/2 in Soil (Days)</i> | <i>Koc (mg/L)</i> | <i>BCF</i> |
|-----------------------|-------------------------------|---------------------------|------------------------------|-----------------------------|----------------------------|-------------------|------------|
| Triadimenol           | 295.76                        | 72                        | Moderate                     | n/a                         | 250                        | 273               | 21         |
| Penconazole           | 284.18                        | 73                        | Moderate                     | >706                        | 138                        | 2205              | 320        |
| Alachlor              | 269.77                        | 240                       | Moderate                     | n/a                         | 8                          | 124               | 39         |
| Metolachlor           | 283.8                         | 530                       | High                         | 97                          | 15-70                      | 200               | 68.8       |
| Dimethoate            | 229.26                        | 39800                     | High                         | 8                           | 20                         | 30                | n/a        |
| Malathion             | 330.36                        | 148                       | Moderate                     | < 1 wk                      | 1-25                       | 217               | 103        |
| Fenthion              | 278.33                        | 4.2                       | Low                          | 2 wks                       | 4-6 wks                    | 1500              | 226        |
| Carbofenothion        | 342.9                         | 0.34                      | Low                          | n/a                         | >6 months                  | 50000             | 1000       |
| Monocrotophos         | 223.16                        | 818000                    | High                         | n/a                         | 7                          | 19                | n/a        |

\*Solubility in water at 20°C

t1/2: Half-life of a compound.

\*\* Solubility in water - <=50 low; 50-500 moderate; >500 high.

Koc: Organic-carbon sorption constant.

BCF: Bio-concentration factor. According to REACH chemicals are “very bioaccumulative” if their BCF is larger than 5,000 and “very persistent” if their half-life in marine water or fresh water exceeds 60 days or their half-life in marine or freshwater sediment exceeds 180 days.

**Note:** Data were assembled by the Pesticide Properties Database

(<http://sitem.herts.ac.uk/aeru/footprint/en/index.htm>) and The Extension Toxicology Network

(<http://extoxnet.orst.edu>).

**Table SM-3.** Residual levels of pesticides ( $\mu\text{g/L}$ ) detected in river water samples

| <i>Site</i> | <i>Sampling period</i> | <i>Triadimenol</i> | <i>Penconazole</i> | <i>Alachlor</i> | <i>Metolachlor</i> | <i>Dimethoate</i> | <i>Malathion</i> | <i>Fenthion</i> |
|-------------|------------------------|--------------------|--------------------|-----------------|--------------------|-------------------|------------------|-----------------|
| 1           | All dates              | n.d.               | n.d.               | n.d.            | n.d.               | n.d.              | n.d.             | n.d.            |
| 2           | All dates              | n.d.               | n.d.               | n.d.            | n.d.               | n.d.              | n.d.             | n.d.            |
| 3           | All dates              | n.d.               | n.d.               | n.d.            | n.d.               | n.d.              | n.d.             | n.d.            |
| 4           | All dates              | n.d.               | n.d.               | n.d.            | n.d.               | n.d.              | n.d.             | n.d.            |
| 5           | All dates              | n.d.               | n.d.               | n.d.            | n.d.               | n.d.              | n.d.             | n.d.            |
| 6           | All dates              | n.d.               | n.d.               | n.d.            | n.d.               | n.d.              | n.d.             | n.d.            |
| 7           | Feb-07                 | n.d.               | n.d.               | n.d.            | n.d.               | n.d.              | n.d.             | n.d.            |
|             | Jun-07                 | n.d.               | n.d.               | n.d.            | n.d.               | n.d.              | n.d.             | n.d.            |
|             | Nov-07                 | n.d.               | n.d.               | n.d.            | n.d.               | n.d.              | n.d.             | n.d.            |
|             | Mar-08                 | n.d.               | <b>0.222</b>       | n.d.            | n.d.               | n.d.              | n.d.             | n.d.            |
| 8           | All dates              | n.d.               | n.d.               | n.d.            | n.d.               | n.d.              | n.d.             | n.d.            |
| 9           | Feb-07                 | n.d.               | <b>0.748</b>       | n.d.            | n.d.               | n.d.              | n.d.             | n.d.            |
|             | Jun-07                 | n.d.               | <b>0.198</b>       | n.d.            | n.d.               | n.d.              | n.d.             | n.d.            |
|             | Nov-07                 | n.d.               | n.d.               | n.d.            | n.d.               | n.d.              | n.d.             | n.d.            |
|             | Mar-08                 | <b>0.098</b>       | n.d.               | n.d.            | n.d.               | <b>5.288</b>      | n.d.             | n.d.            |
| 10          | Feb-07                 | n.d.               | <b>0.546</b>       | <b>0.124</b>    | <b>0.314</b>       | n.d.              | <b>0.548</b>     | <b>0.06</b>     |
|             | Jun-07                 | n.d.               | n.d.               | n.d.            | n.d.               | n.d.              | n.d.             | n.d.            |
|             | Nov-07                 | n.d.               | <b>0.312</b>       | n.d.            | n.d.               | n.d.              | n.d.             | n.d.            |
|             | Mar-08                 | n.d.               | <b>0.071</b>       | n.d.            | n.d.               | n.d.              | n.d.             | n.d.            |
| 11          | All dates              | n.d.               | n.d.               | n.d.            | n.d.               | n.d.              | n.d.             | n.d.            |
| 12          | All dates              | n.d.               | n.d.               | n.d.            | n.d.               | n.d.              | n.d.             | n.d.            |

(n.d = Not detected)



**Table SM- 4.** Residual levels of pesticides (ng/g-dw) detected in river sediment samples (n.d. Not detected)

| <i>Site</i> | <i>Sampling period</i> | <i>Triadimenol</i> | <i>Penconazole</i> | <i>Metolachlor</i> | <i>Monocrotophos</i> | <i>Malathion</i> | <i>Carbofenothion</i> | <i>Fenthion</i> |
|-------------|------------------------|--------------------|--------------------|--------------------|----------------------|------------------|-----------------------|-----------------|
| 1           | All dates              | n.d.               | n.d.               | n.d.               | n.d.                 | n.d.             | n.d.                  | n.d.            |
| 2           | All dates              | n.d.               | n.d.               | n.d.               | n.d.                 | n.d.             | n.d.                  | n.d.            |
| 3           | Feb-07                 | <b>32.918</b>      | n.d.               | n.d.               | n.d.                 | n.d.             | n.d.                  | n.d.            |
|             | Jun-07                 | n.d.               | n.d.               | n.d.               | n.d.                 | n.d.             | n.d.                  | n.d.            |
|             | Nov-07                 | n.d.               | n.d.               | n.d.               | n.d.                 | n.d.             | n.d.                  | n.d.            |
|             | Mar-08                 | <b>162.714</b>     | n.d.               | n.d.               | n.d.                 | n.d.             | n.d.                  | n.d.            |
| 4           | Feb-07                 | n.d.               | n.d.               | n.d.               | n.d.                 | n.d.             | n.d.                  | n.d.            |
|             | Jun-07                 | n.d.               | n.d.               | n.d.               | n.d.                 | n.d.             | n.d.                  | n.d.            |
|             | Nov-07                 | n.d.               | n.d.               | n.d.               | n.d.                 | n.d.             | n.d.                  | n.d.            |
|             | Mar-08                 | <b>238.484</b>     | n.d.               | n.d.               | <b>296.547</b>       | n.d.             | n.d.                  | n.d.            |
| 5           | Feb-07                 | n.d.               | <b>905.937</b>     | <b>335.975</b>     | n.d.                 | n.d.             | <b>83.936</b>         | <b>818.062</b>  |
|             | Jun-07                 | n.d.               | n.d.               | n.d.               | n.d.                 | n.d.             | n.d.                  | n.d.            |
|             | Nov-07                 | n.d.               | n.d.               | n.d.               | n.d.                 | n.d.             | n.d.                  | n.d.            |
|             | Mar-08                 | n.d.               | n.d.               | n.d.               | n.d.                 | n.d.             | n.d.                  | n.d.            |
| 6           | All dates              | n.d.               | n.d.               | n.d.               | n.d.                 | n.d.             | n.d.                  | n.d.            |
| 7           | Feb-07                 | <b>65.96</b>       | n.d.               | <b>166.098</b>     | n.d.                 | <b>308.761</b>   | n.d.                  | n.d.            |
|             | Jun-07                 | n.d.               | n.d.               | n.d.               | n.d.                 | n.d.             | n.d.                  | n.d.            |
|             | Nov-07                 | n.d.               | n.d.               | n.d.               | n.d.                 | n.d.             | n.d.                  | n.d.            |
|             | Mar-08                 | n.d.               | n.d.               | n.d.               | n.d.                 | n.d.             | n.d.                  | n.d.            |
| 8           | All dates              | n.d.               | n.d.               | n.d.               | n.d.                 | n.d.             | n.d.                  | n.d.            |
| 9           | All dates              | n.d.               | n.d.               | n.d.               | n.d.                 | n.d.             | n.d.                  | n.d.            |
| 10          | Feb-07                 | <b>51.944</b>      | n.d.               | n.d.               | n.d.                 | n.d.             | n.d.                  | n.d.            |
|             | Jun-07                 | n.d.               | n.d.               | n.d.               | n.d.                 | n.d.             | n.d.                  | n.d.            |
|             | Nov-07                 | n.d.               | n.d.               | n.d.               | n.d.                 | n.d.             | n.d.                  | n.d.            |
|             | Mar-08                 | n.d.               | n.d.               | n.d.               | n.d.                 | n.d.             | n.d.                  | n.d.            |
| 11          | All dates              | n.d.               | n.d.               | n.d.               | n.d.                 | n.d.             | n.d.                  | n.d.            |
| 12          | All dates              | n.d.               | n.d.               | n.d.               | n.d.                 | n.d.             | n.d.                  | n.d.            |

**Table SM-5.** Pesticide toxicity data for different aquatic organisms and trophic levels.

| Pesticide Name | <i>Fish</i>                           |                            | <i>Aquatic invertebrates</i>          |                            | <i>Algae</i>                          |                                        |
|----------------|---------------------------------------|----------------------------|---------------------------------------|----------------------------|---------------------------------------|----------------------------------------|
|                | <i>Oncorhynchus mykiss</i>            |                            | <i>Daphnia magna</i>                  |                            | <i>Chironomus riparius</i>            | <i>Pseudokirchneriella subcapitata</i> |
|                | Acute 96 hour LC <sub>50</sub> (µg/L) | Chronic 21 day NOEC (µg/L) | Acute 48 hour EC <sub>50</sub> (µg/L) | Chronic 21 day NOEC (µg/L) | Acute 24 hour EC <sub>50</sub> (µg/L) | Acute 72 hour EC <sub>50</sub> (µg/L)  |
| Triadimenol    | 21300                                 | 3130                       | 51000                                 | 100                        | -                                     | 9600                                   |
| Penconazole    | 1130                                  | 320                        | 6750                                  | 60                         | -                                     | 2000                                   |
| Alachlor       | 1800                                  | 190                        | 10000                                 | 220                        | 27500                                 | 966                                    |
| Metolachlor    | 3900                                  | -                          | 23500                                 | 707                        | -                                     | 57100                                  |
| Dimethoate     | 30200                                 | 400                        | 2000                                  | 40                         | 481*                                  | 90400                                  |
| Malathion      | 18                                    | 91                         | 0.7                                   | 0.15                       | 0.34                                  | 13000                                  |
| Fenthion       | 800                                   | -                          | 5.7                                   | -                          | 5.62                                  | 1790                                   |
| Carbofenthion  | 56                                    | 6.3                        | -                                     | -                          | -                                     | -                                      |
| Monocrotophos  | 7000                                  | -                          | 23                                    | -                          | -                                     | -                                      |

\* Acute 48 hour EC<sub>50</sub>

NOEC: No observed effect concentration

**Note:** Data were assembled by the Pesticide Properties Database

(<http://sitem.herts.ac.uk/aeru/footprint/en/index.htm>), The Extension Toxicology Network

(<http://extoxnet.orst.edu>) and the PAN Pesticide Database (<http://www.pesticideinfo.org>)

**Table SM-6.** PCA results of all chemical and physicochemical variables. For clarity reasons only high loadings are presented.

| <i>PC Axis</i>   | <i>Eigenvalues</i> | <i>%Variation</i> | <i>Cum.%Variation</i> |
|------------------|--------------------|-------------------|-----------------------|
| 1                | 15.9               | 42.9              | 42.9                  |
| 2                | 4.9                | 13.2              | 56.1                  |
| 3                | 4.32               | 11.7              | 67.8                  |
| Variable         | PC1                | PC2               | PC3                   |
| DO               | <b>0.23</b>        | 0.081             | -0.064                |
| T                | <b>-0.193</b>      | 0.138             | 0.087                 |
| Conductivity     | <b>-0.195</b>      | <b>0.217</b>      | 0.091                 |
| COD              | <b>-0.198</b>      | <b>-0.232</b>     | -0.01                 |
| BOD <sub>5</sub> | <b>-0.197</b>      | <b>-0.233</b>     | -0.013                |
| TSS              | <b>-0.188</b>      | <b>-0.249</b>     | 0.062                 |
| Ca               | -0.067             | <b>0.369</b>      | 0.108                 |
| Na               | <b>-0.23</b>       | -0.031            | -0.019                |
| K                | <b>-0.188</b>      | <b>-0.21</b>      | 0.097                 |
| HCO <sub>3</sub> | <b>-0.189</b>      | <b>0.21</b>       | 0.036                 |
| Cl               | <b>-0.202</b>      | -0.002            | -0.092                |
| NO <sub>3</sub>  | <b>-0.186</b>      | 0.209             | 0.032                 |
| NO <sub>2</sub>  | <b>-0.197</b>      | -0.019            | 0.233                 |
| NH <sub>4</sub>  | <b>-0.197</b>      | 0.016             | -0.019                |
| PO <sub>4</sub>  | <b>-0.202</b>      | 0.006             | -0.029                |
| Total N          | <b>-0.216</b>      | 0.058             | 0.031                 |
| Total P          | <b>-0.175</b>      | <b>-0.25</b>      | -0.065                |
| N-TOTAL          | <b>-0.202</b>      | 0.178             | 0.038                 |
| Water Hardness   | -0.119             | <b>0.312</b>      | 0.149                 |
| Total Phenols    | -0.022             | <b>-0.329</b>     | -0.104                |
| Water Discharge  | -0.06              | <b>-0.233</b>     | 0.145                 |
| Cr               | 0.166              | 0.015             | <b>0.223</b>          |
| Mn               | <b>0.233</b>       | -0.052            | -0.005                |
| Co               | <b>0.205</b>       | -0.074            | 0.152                 |
| Ni               | <b>0.178</b>       | -0.022            | <b>0.203</b>          |
| Cu               | 0.103              | -0.063            | <b>0.427</b>          |
| Zn               | 0.022              | -0.138            | <b>0.431</b>          |
| As               | <b>0.218</b>       | -0.04             | 0.143                 |
| Ba               | -0.055             | <b>-0.213</b>     | -0.017                |
| Mo               | 0.027              | 0.07              | <b>0.413</b>          |
| Pb               | -0.017             | -0.111            | <b>0.324</b>          |
